# Supplementary material for: Volatilizable template-assisted scalable preparation of honeycomb-like porous carbons for efficient oxygen electroreduction
Source: Royal Society of Chemistry journal article supplement (doi:10.1039/c6ta03570a), 2016-01-01
Supplement: c6ta03570a1.pdf [file c6ta03570a1.pdf]

Supporting Information

## **Volatilizable Templates-Assisted Scalable Preparation of Honeycomb-like Porous Carbons for Efficient Oxygen Electroreduction**

Wenhan Niu,<sup>a</sup> Ligui Li,<sup>\*,a,b</sup> Nan Wang,<sup>a</sup> Shuaibo Zeng,<sup>a</sup> Ji Liu,<sup>a</sup> Dengke Zhao,<sup>a</sup> and Shaowei Chen<sup>\*,a,c</sup>

<sup>a</sup>New Energy Research Institute, College of Environment and Energy, South China University of Technology, Guangzhou 510006, China

E-mail: esguili@scut.edu.cn

<sup>b</sup> Guangdong Provincial Key Laboratory of Atmospheric Environment and Pollution Control, College of Environment and Energy, South China University of Technology, Guangzhou 510006, China

<sup>c</sup>Department of Chemistry and Biochemistry, University of California, 1156 High Street, Santa Cruz, California 95064, USA

Email: Shaowei@ucsc.edu

**Table S1.** Summary of elemental concentrations in the carbon samples

| Samples       | XPS (at.%) |       |      |      |       |             |            |             |
|---------------|------------|-------|------|------|-------|-------------|------------|-------------|
|               | C          | N     | Fe   | Cl   | O     | Pyridinic-N | Pyrrolic-N | Graphitic-N |
| PPyNSs        | 62.4       | 25.6  | 0.56 | 0.98 | 10.46 | -           | -          | -           |
| HPC-700       | 73.48      | 20.4  | 0.28 | -    | 5.84  | 3.91        | 2.68       | 13.81       |
| HPC-800       | 82.89      | 11.54 | 0.26 | -    | 5.31  | 1.51        | 0.46       | 9.57        |
| HPC-900       | 85.86      | 7.21  | 0.23 | -    | 6.7   | 0.70        | 0.041      | 6.47        |
| PC(NF)-800    | 84.11      | 5.39  | -    | -    | 10.5  | 1.74        | 0.23       | 3.42        |
| PC(Sp/Sh)-800 | 87.5       | 6.2   | -    | -    | 6.3   | 1.92        | 0.29       | 3.99        |

**Table S2.** Summary of the ORR catalytic activities of heteroatom-doped carbon catalysts in 0.1 M KOH (electrode rotating speed 1600 rpm).

| Catalyst                                     | Catalyst loading (mg cm <sup>-2</sup> ) | Half-wave potential (V vs. RHE) | Current density at 0.8 V (mA cm <sup>-2</sup> ) | Reference                                  |
|----------------------------------------------|-----------------------------------------|---------------------------------|-------------------------------------------------|--------------------------------------------|
| Vertically aligned N-doped CNTs              | unknown                                 | 0.84                            | 2.65                                            | Science 2009, 323, 760                     |
| Vertically aligned N,B-codoped CNTs          | unknown                                 | 0.75                            | 1.80                                            | Angew. Chem. Int. Ed. 2011, 50 (49), 11756 |
| N-doped C/CNTs                               | 0.6                                     | 0.82                            | 3.40                                            | Angew. Chem. Int. Ed. 2014, 126 (16), 4186 |
| Carbon nitride/graphene                      | 0.071                                   | 0.69                            | 0.75                                            | Angew. Chem. Int. Ed. 2011, 50, 5339       |
| N-doped porous graphene                      | 0.037                                   | 0.71                            | 1.15                                            | Adv. Funct. Mater. 2012, 22, 3634-3640     |
| N,B co-doped graphene                        | 0.28                                    | 0.69                            | 1.00                                            | Angew. Chem. Int. Ed. 2013, 52, 3110       |
| N-doped graphene quantum dots                | 0.28                                    | 0.65                            | <0.2                                            | J. Am. Chem. Soc. 2012, 134, 15            |
| N-doped carbon nanosheets                    | 0.60                                    | 0.84                            | 3.20                                            | Angew. Chem. Int. Ed. 2014, 53, 1570.      |
| N-doped carbon nanocages                     | 0.10                                    | 0.71                            | 0.5                                             | Adv. Mater. 2012, 24, 5593                 |
| N-doped ordered mesoporous carbon            | 0.026                                   | 0.69                            | 0.7                                             | Angew. Chem. Int. Ed. 2010, 49, 2565       |
| P-doped ordered mesoporous carbons           | unknown                                 | 0.67                            | 1.7                                             | J. Am. Chem. Soc. 2012, 134, 16127         |
| N-doped mesoporous carbon                    | 0.81                                    | 0.82                            | 2.8                                             | J. Am. Chem. Soc. 2010, 133, 206           |
| PDA-based carbon SMSs                        | 0.25                                    | 0.76                            | <2.0                                            | Adv. Mater. 2013, 25, 998-1003             |
| Macroporous C <sub>3</sub> N <sub>4</sub> /C | 0.085                                   | 0.67                            | 0.4                                             | Angew. Chem. Int. Ed. 2012, 51, 3892       |
| BP-NFe                                       | 0.39                                    | 0.81                            | <3.0                                            | Adv. Mater. 2013, 25, 6879-6883            |
| Meso/micro-PoPD                              | 0.1                                     | 0.85                            | 4.32                                            | Nat. Commun. 2014, 5, 4973                 |
| <b>HPC-800</b>                               | <b>0.4</b>                              | <b>0.85</b>                     | <b>4.83</b>                                     | <b>This work</b>                           |
| <b>Pt/C</b>                                  | <b>0.2</b>                              | <b>0.81</b>                     | <b>3.00</b>                                     | <b>This work</b>                           |

**Table S3.** Summary of the performance of Zn-Air batteries reported in recent literature.

| ORR Catalyst                             | Zn electrode   | Electrolyte    | Voltage @<br>1 mA cm <sup>-2</sup> | Voltage @<br>10 mA cm <sup>-2</sup> | Voltage @<br>100 mA cm <sup>-2</sup> | Reference                                   |
|------------------------------------------|----------------|----------------|------------------------------------|-------------------------------------|--------------------------------------|---------------------------------------------|
| PEDOT                                    | Zn rod         | 1 M KOH        | 1.07                               | -                                   |                                      | Science 2008, 321, 671                      |
| CoO/N-CNT                                | Zn foil        | 6 M KOH        | -                                  | 1.3                                 |                                      | Nat. Commun. 2013, 4, 1805                  |
| FePc-Py-CNT                              | Zn powder      | 6 M KOH        | 1.32                               | 1.25                                |                                      | Nat. Commun. 2014, 2076                     |
| Mn <sub>3</sub> O <sub>4</sub> /graphene | Zn powder      | unknown        | -                                  | 1.23                                | 0.92                                 | Energy Environ. Sci. 2011, 4, 4148          |
| Amorphous MnO <sub>x</sub> /C            | Zn powder      | 6 M KOH        | -                                  | 1.24                                | 1.04                                 | Nano Lett. 2011, 11, 5362                   |
| N-doped CNTs                             | Zn plate       | 6 M KOH        | -                                  | 1.22                                | 0.76                                 | Electrochim. Acta 2011, 56 (14), 5080-5084. |
| Fe, Co, N-doped C                        | Zn plate       | 6 M KOH        | -                                  | -                                   | 1.1                                  | J. Power Sources 2011, 196 (7), 3673-3677.  |
| N-CNF aerogel                            | Zn foil        | 6 M KOH        | 1.34                               | 1.25                                | -                                    | Nano energy 2015(11),366-376                |
| Meso/micro-PoPD                          | Zn foil        | 6 M KOH        | 1.36                               | 1.28                                | 1.01                                 | Nat. Commun. 2014, 5, 4973                  |
| <b>HPC-800</b>                           | <b>Zn foil</b> | <b>6 M KOH</b> | <b>1.40</b>                        | <b>1.29</b>                         | <b>0.94</b>                          | <b>This work</b>                            |
| <b>Pt/C</b>                              | <b>Zn foil</b> | <b>6 M KOH</b> | <b>1.38</b>                        | <b>1.28</b>                         | <b>0.89</b>                          | <b>This work</b>                            |

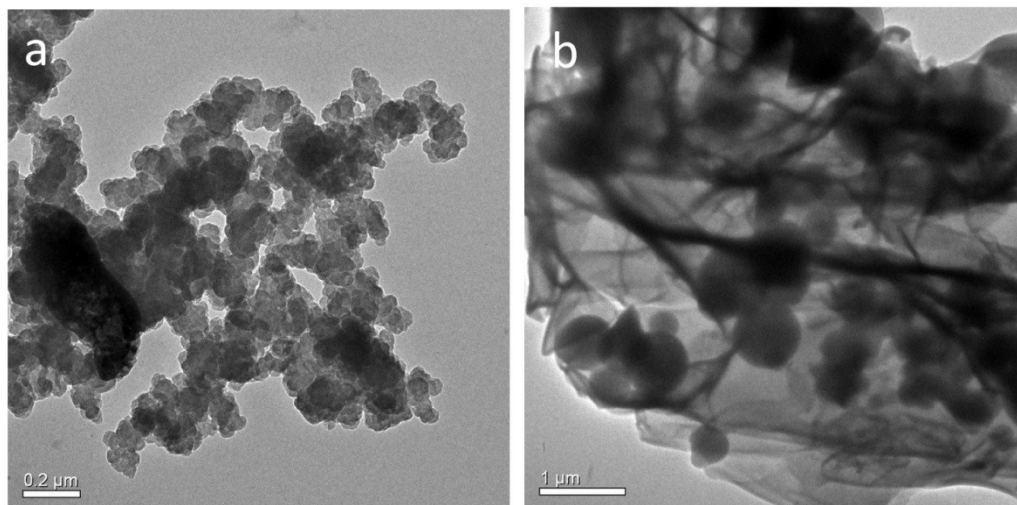

**Fig.S1** Representative TEM images of (a) PPyNFs and (b) PPySp/Sh.

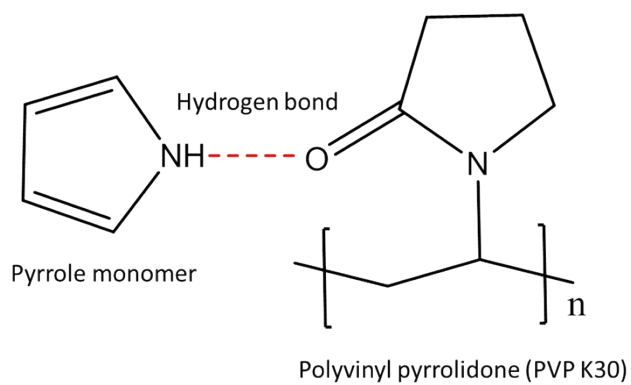

**Fig.S2** Schematic diagram of pyrrole monomer adsorbed to the ketone group of PVP by a hydrogen bond.

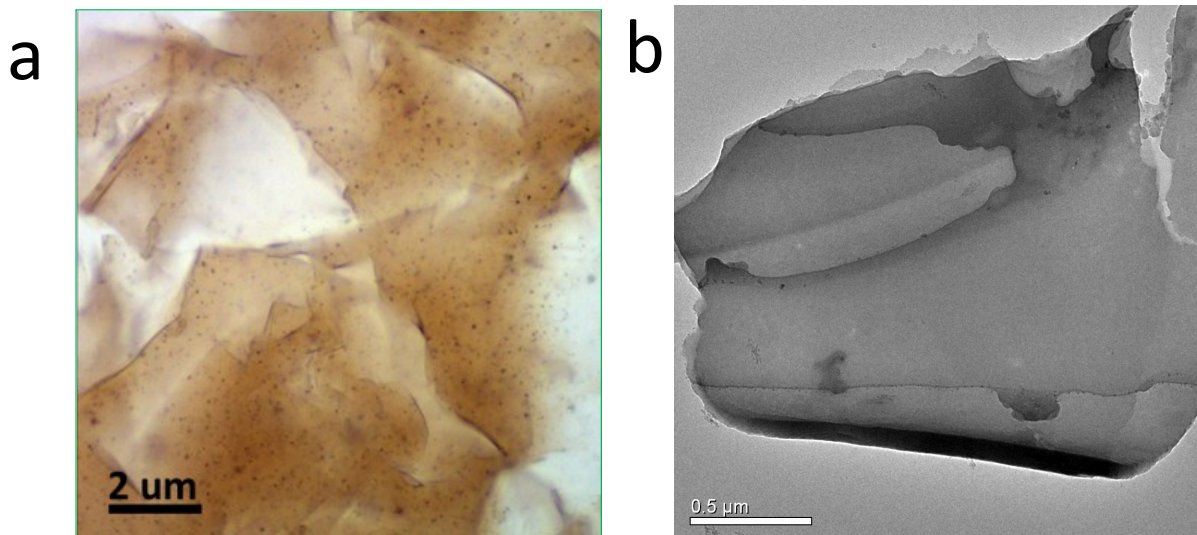

**Fig.S3** (a) Optical image of polypyrrole nanosheets prepared by using ammonium persulphate as the polymerization initiator instead of  $\text{FeCl}_3$ . (b) The corresponding carbon sheets derived from the carbonization of polypyrrole nano-sheets at  $800^\circ\text{C}$ .

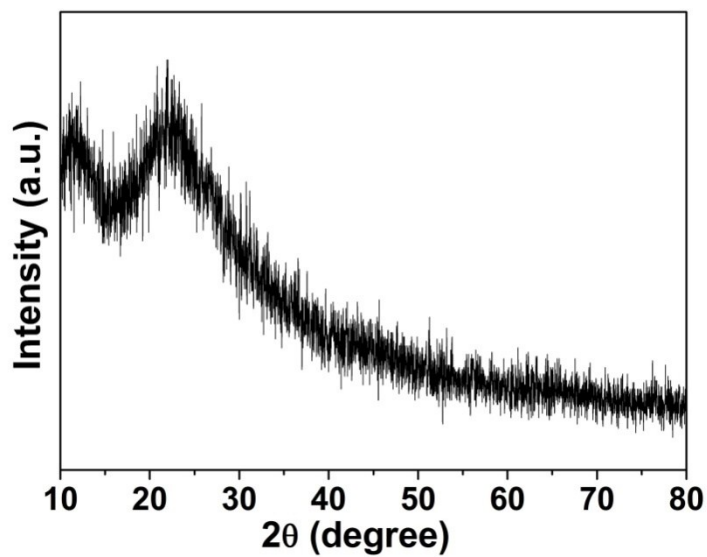

**Fig.S4** Typical XRD pattern of PPyNSs. The diffraction peaks at  $2\theta$  of  $12^\circ$  and  $23^\circ$  are ascribed to crystalline polypyrrole.

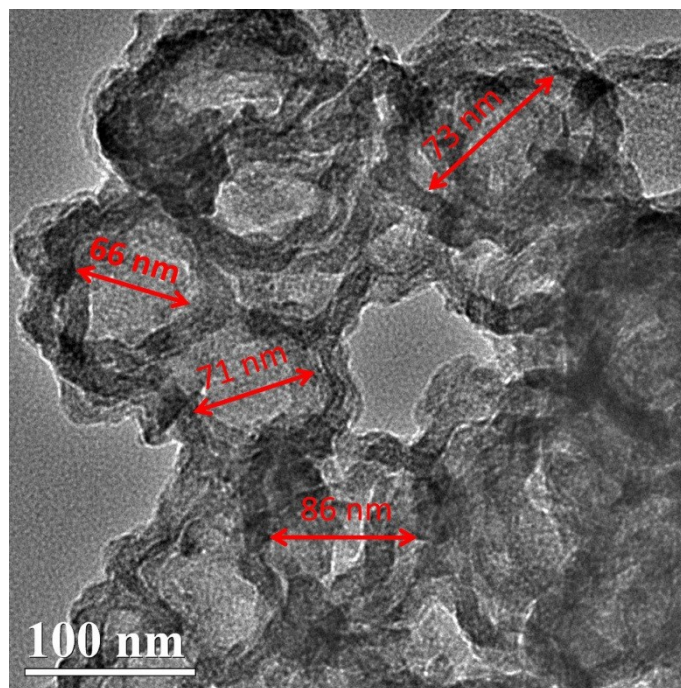

**Fig.S5** Representative TEM image of HPC-800 with apparent macropores of 50-100nm.

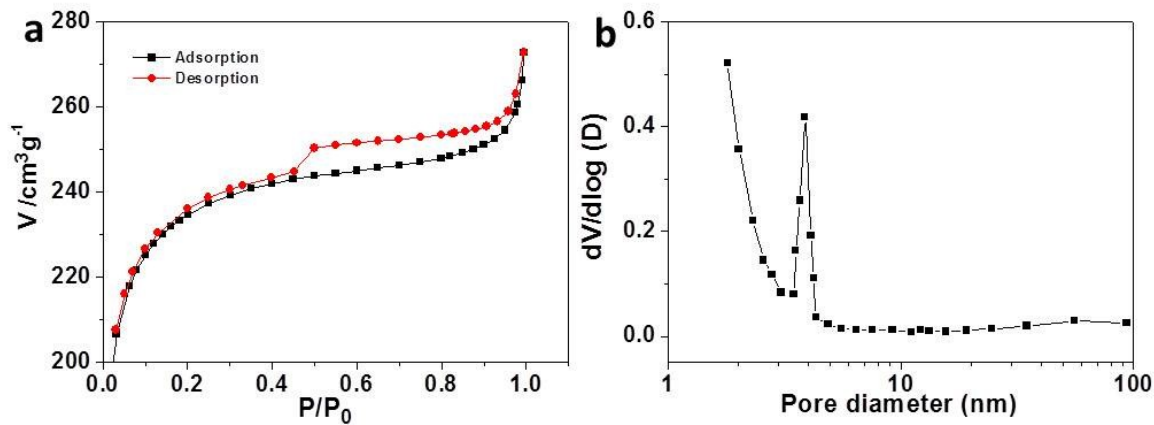

**Fig. S6** (a)  $N_2$  adsorption/desorption isotherm and (b) the corresponding pore size distribution of HPC-800.



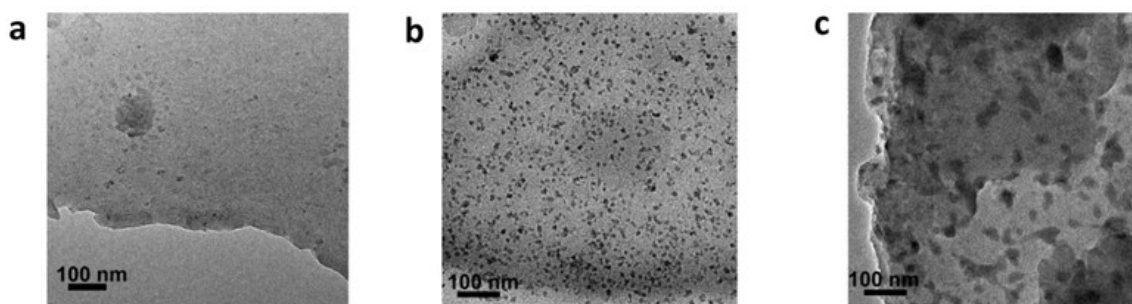

**Fig. S7** Representative TEM images of (a) PPyNSs, (b) HPC-300, and (c) HPC-500.

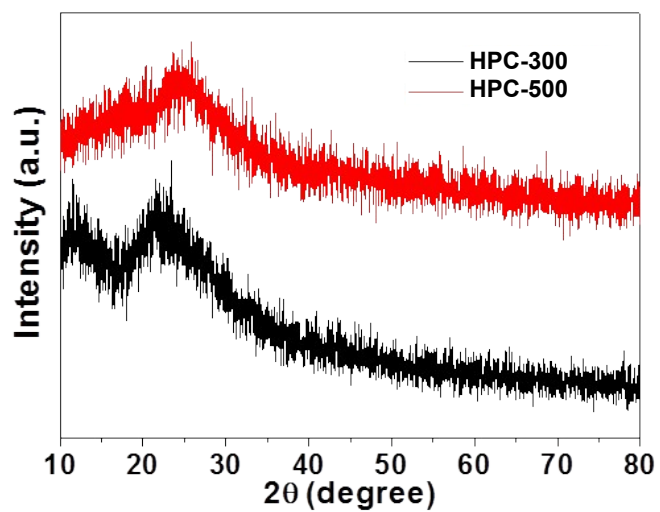

**Fig. S8** XRD patterns of HPC-300 and HPC-500.

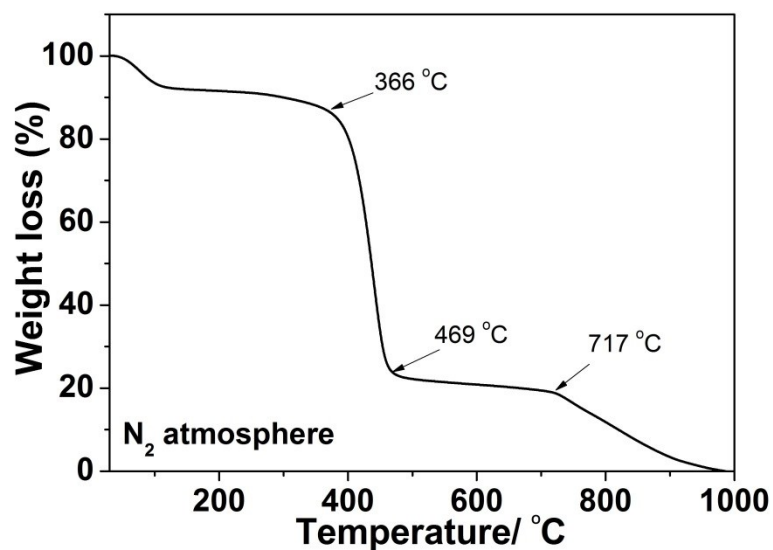

**Fig. S9** TGA curve of PPyNSs from 30 to 1000 °C in a N<sub>2</sub> atmosphere at a heating rate of 5 °Cmin<sup>-1</sup>.

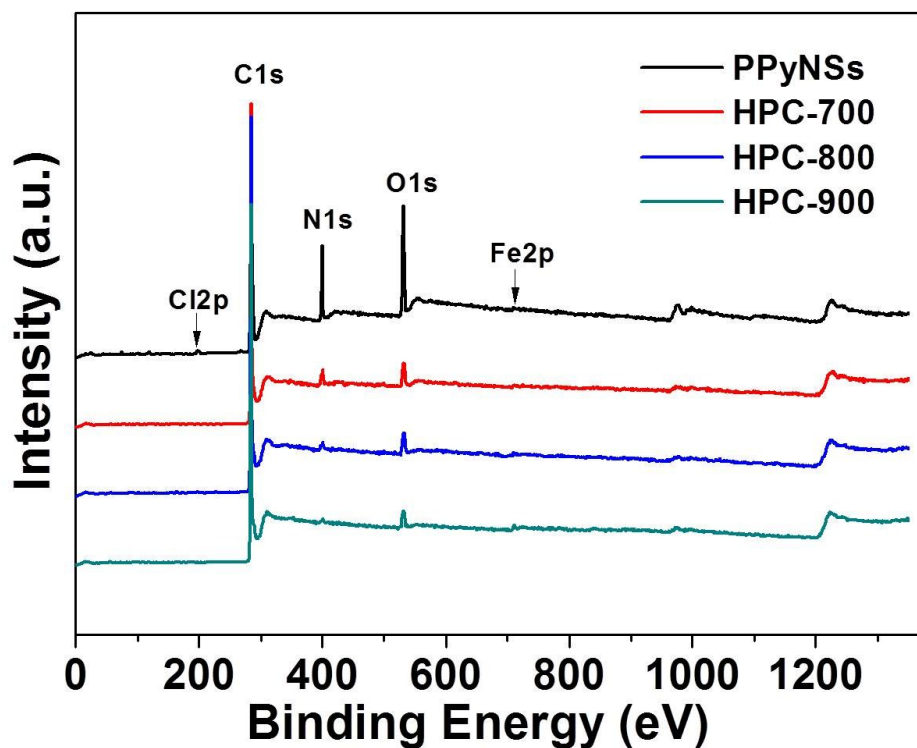

**Fig. S10** XPS survey spectra of PPyNSs and HPC-T (T = 700, 800 and 900).



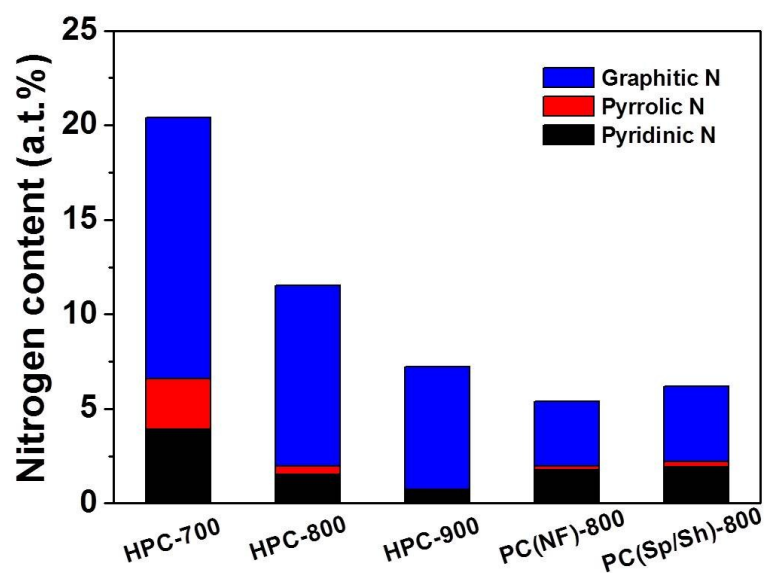

**Fig. S11** Concentrations of graphitic N, pyrrolic N and pyridinic N in HPC-T (700, 800 and 900), PC(NF)-800 and PC(Sp/Sh)-800.

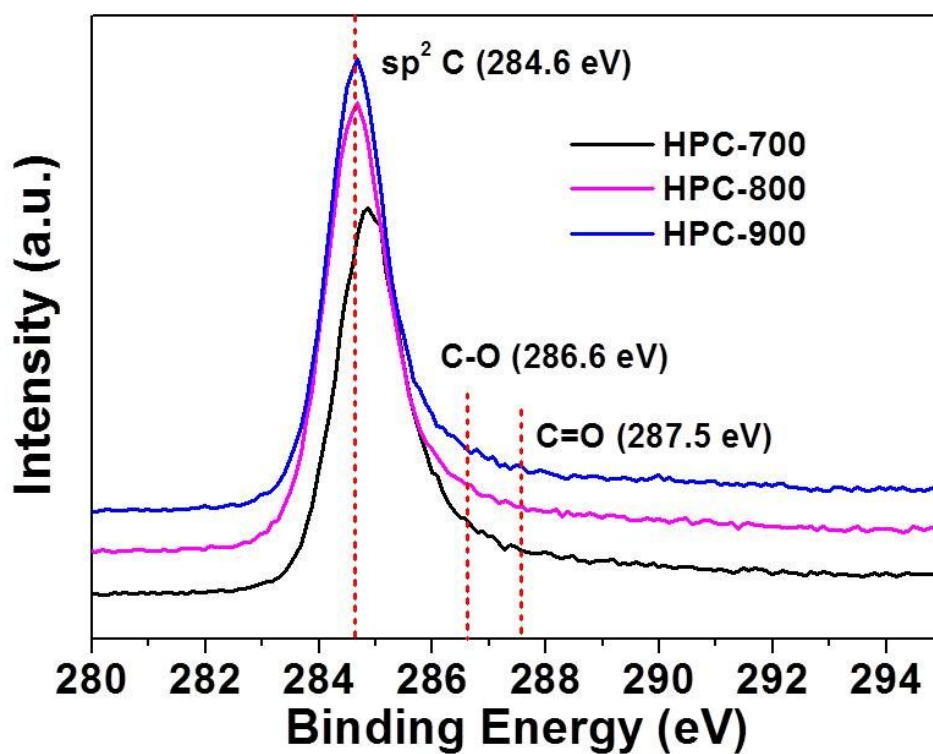

**Fig. S12** C<sub>1s</sub> spectra of HPC-T (T=700, 800 and 900).

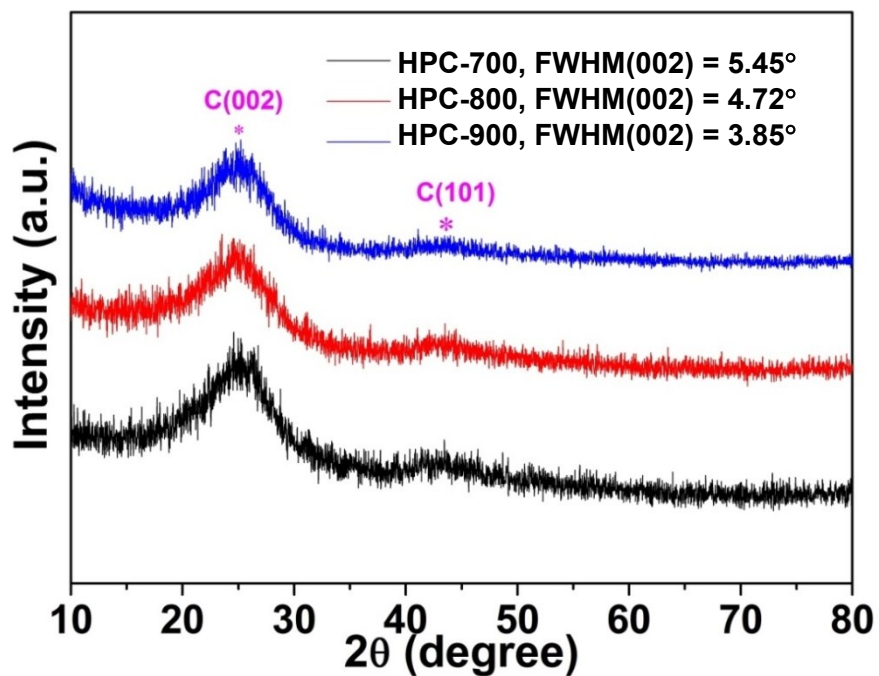

**Fig. S13** XRD patterns of HPC-T (T=700, 800 and 900°C). One can see that with increasing pyrolysis temperature, the FWHM of the HPC-T (002) diffraction peaks decreased, indicating an increasing degree of graphitization in the sample.

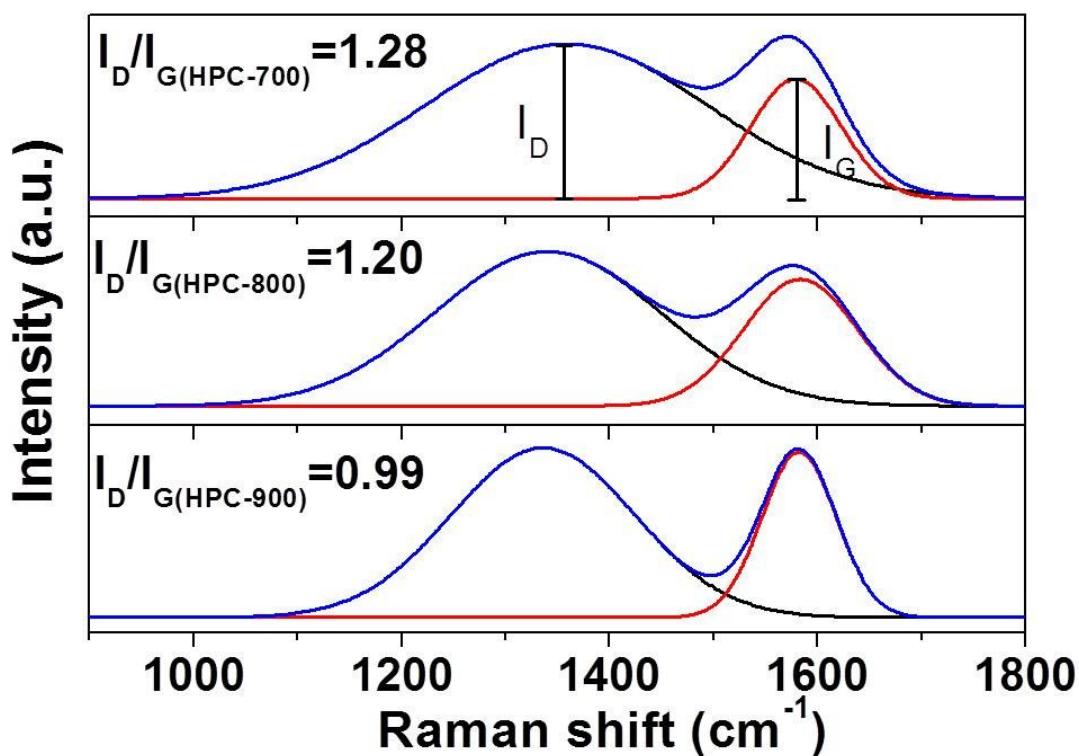

**Fig.S14** Raman spectra of HPC-T (T = 700, 800 and 900). The graphitic D and G bands can be clearly seen at ca.  $1354 \text{ cm}^{-1}$  and  $1578 \text{ cm}^{-1}$ , respectively for all samples, and the intensity ratio of the D and G band ( $I_D/I_G$ ) varied slightly with the pyrolysis temperature, which was observed at 0.94 for HPC-700, 0.97 for HPC-800 and 1.04 for HPC-900. That is, when the pyrolysis temperature was increased from 700 to 900 °C, one observed increasing graphitization of the  $\text{sp}^2$  carbon walls in the macro/mesoporous carbon.

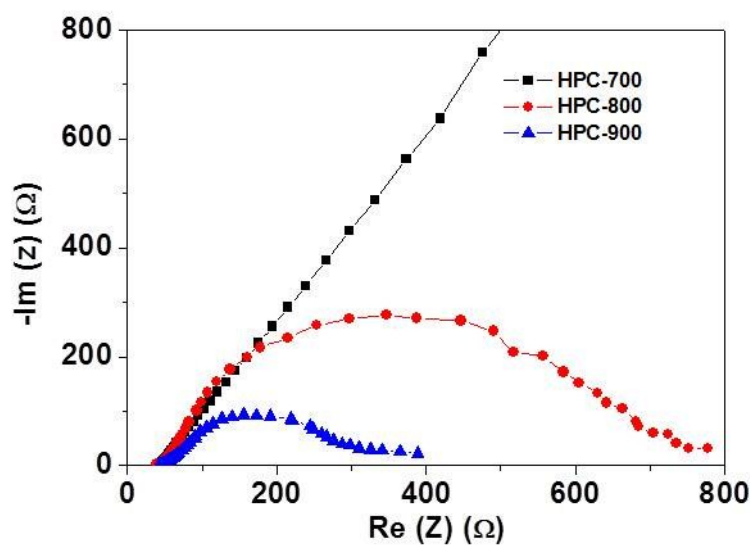

**Fig.S15** Electrochemical impedance spectroscopy (EIS) spectra of HPC-T (T = 700, 800 and 900). The electrochemical impedance data was recorded in O<sub>2</sub>-saturated 0.1 M KOH at +0.85 V vs RHE with an AC amplitude of 5 mV in frequency of 10 kHz to 0.01 Hz. Electrode rotation speed was 1600 rpm.

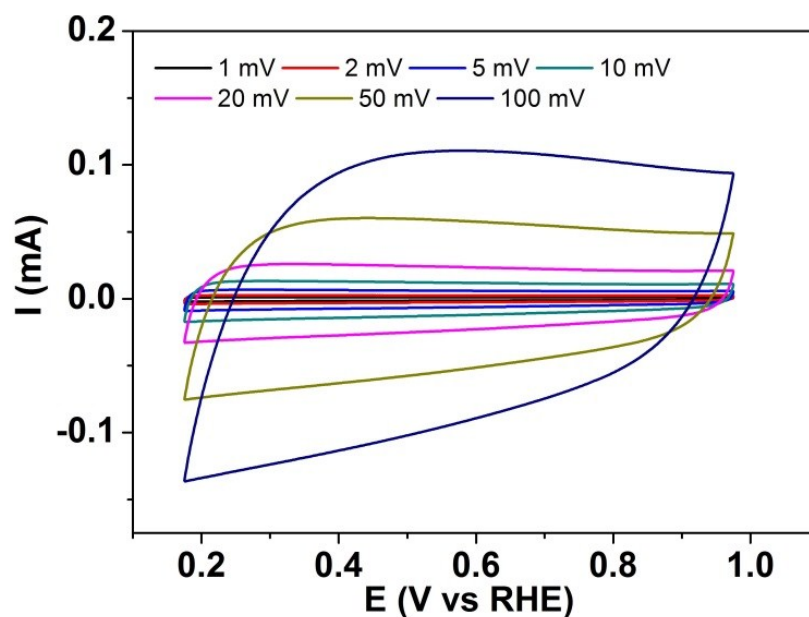

**Fig.S16** CVs of HPC-800 in a N<sub>2</sub>-saturated 6 M KOH aqueous solution at a sweep rate of 1 mV s<sup>-1</sup> to 100 mV s<sup>-1</sup>.

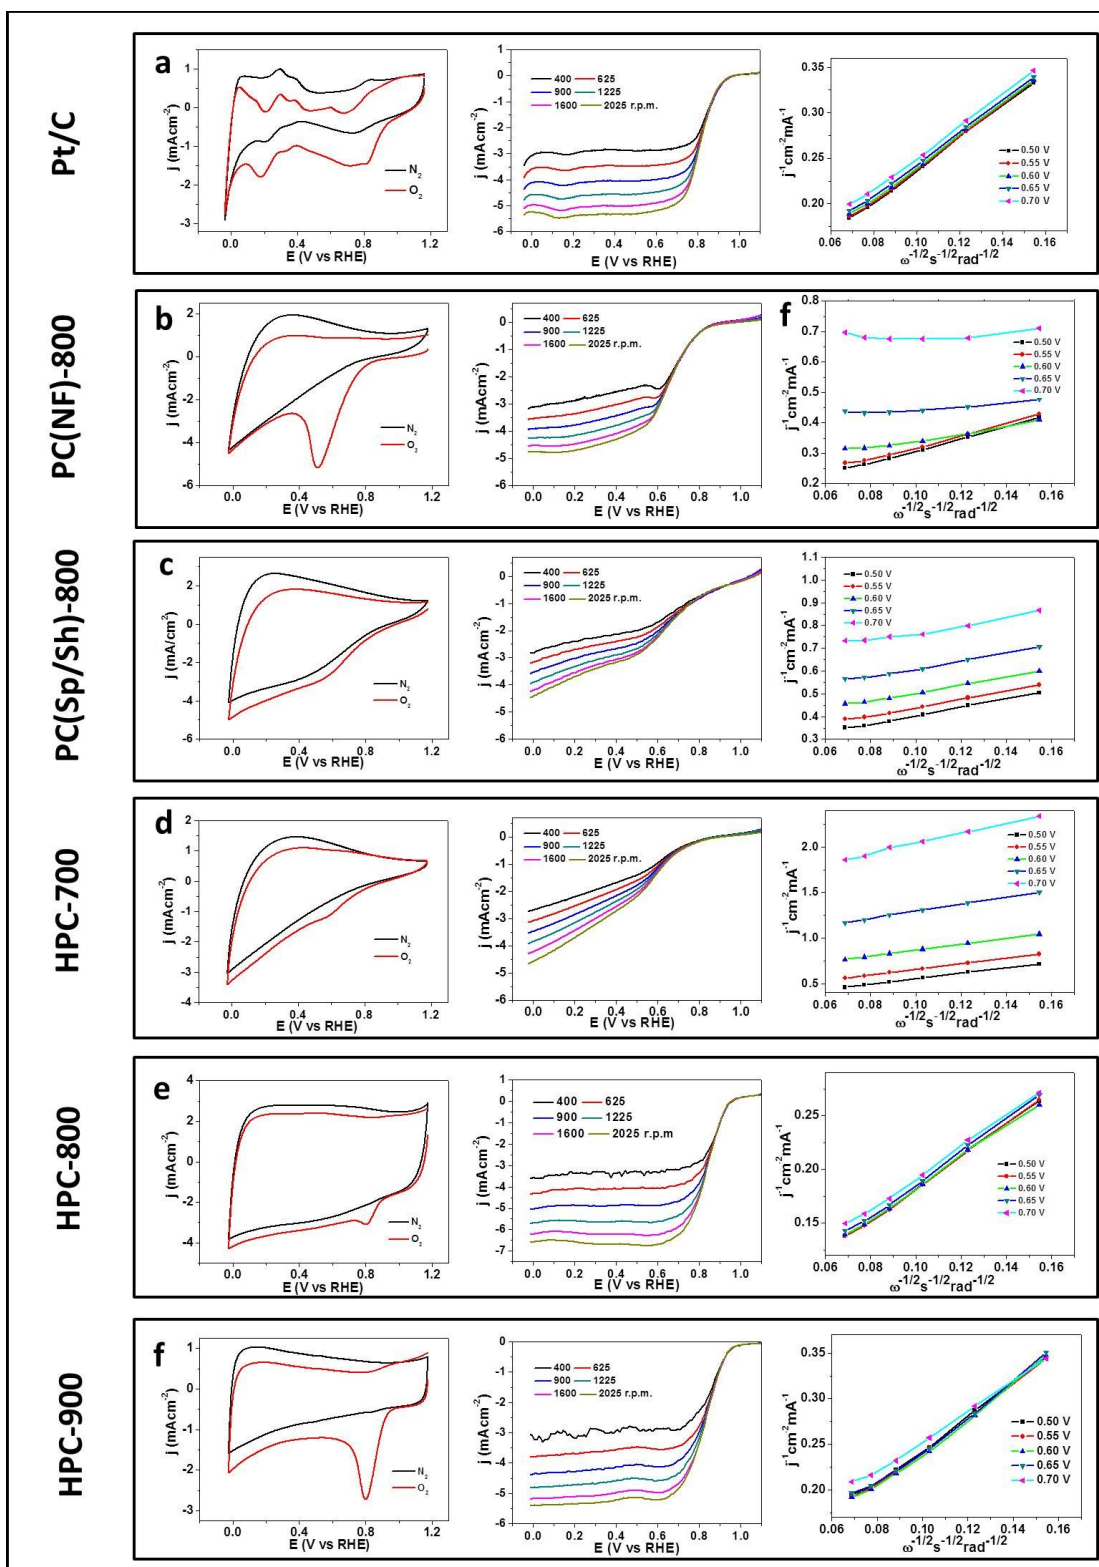

**Fig.S17** CVs, RRDE curves and K-L plots of (a) Pt/C, (b) PC(NF)-800, (c) PC(Sp/Sh)-800, (d) HPC-700, (e) HPC-800 and (f) HPC-900 in  $O_2$ -saturated 0.1 M KOH at a potential sweep rate of  $10 \text{ mVs}^{-1}$  and electrode-rotation speed of 400 to 2025 rpm.

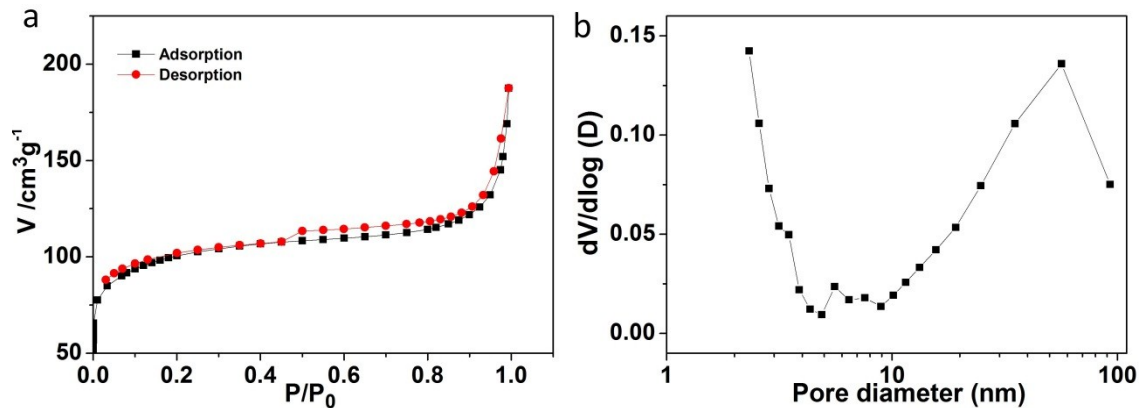

**Fig.S18** (a)  $N_2$  adsorption/desorption isotherm and (b) the corresponding pore size distribution of PC(NF)-800. The BET surface area of PC(NF)-800 was determined to be  $345.9 \text{ m}^2\text{g}^{-1}$ . The pore size distribution suggests that the PC(NF)-800 was composed of two kinds of pores, the small pores with a diameter size less than 4 nm, and the large pores with diameter in the range from 10 to 100 nm.

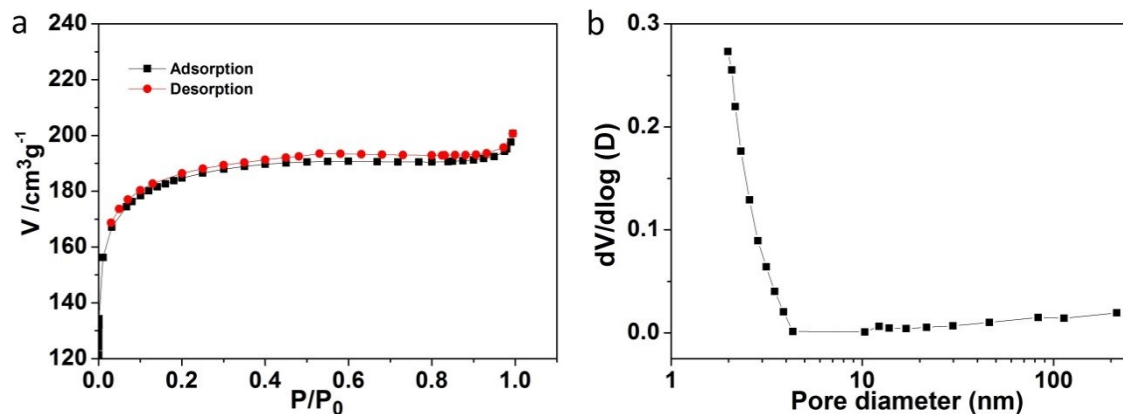

**Fig.S19** (a)  $N_2$  adsorption/desorption isotherm and (b) the corresponding pore size distribution of PC(Sp/Sh)-800 (BET surface area=  $623.4 \text{ m}^2\text{g}^{-1}$ , pore diameter < 3nm). The pore size distribution suggests that there was only one type of porous structure with a diameter less than 3 nm in PC(Sp/Sh)-800.



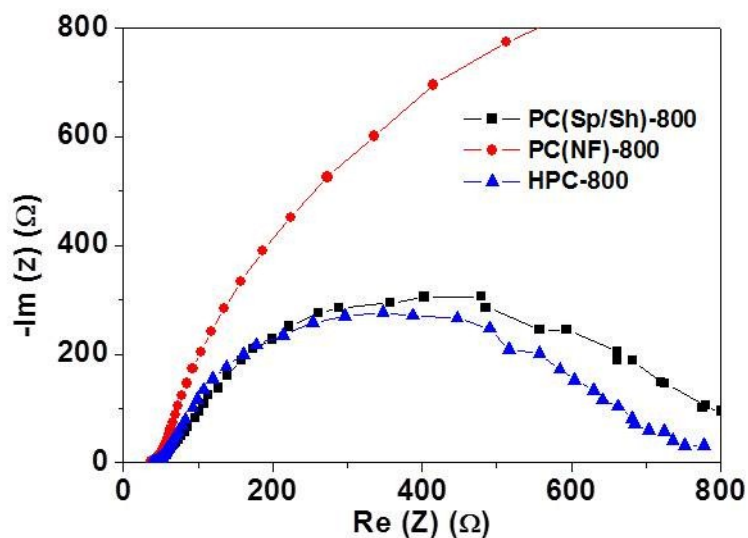

**Fig.S20** Electrochemical impedance spectra of carbon catalysts derived from polypyrrole of different morphologies. The electrochemical impedance data was recorded in  $O_2$ -saturated 0.1 M KOH at +0.85 Vvs RHE with an AC amplitude of 5 mV in frequency of 10 kHz to 0.01 Hz. Electrode rotation speed was 1600 rpm.

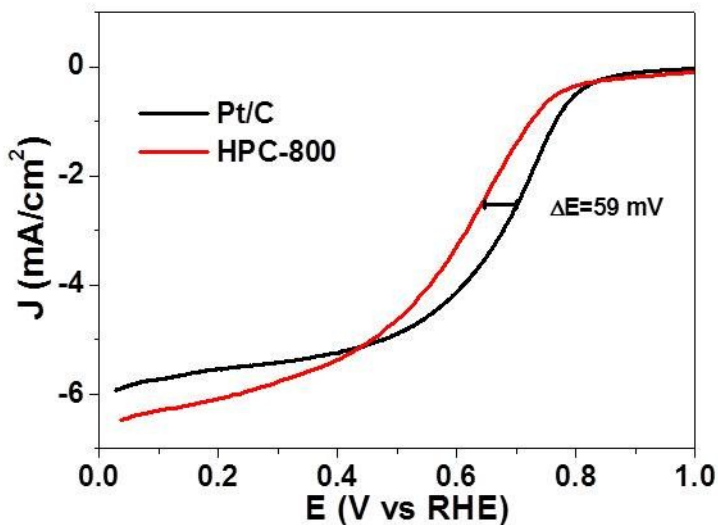

**Fig.S21** LSV curves of HPC-800 and Pt/C in an  $O_2$ -saturated 0.1 M  $HClO_4$  aqueous solution at a potential sweep rate of  $10 \text{ mVs}^{-1}$  with the electrode rotation speed of 1600 rpm.

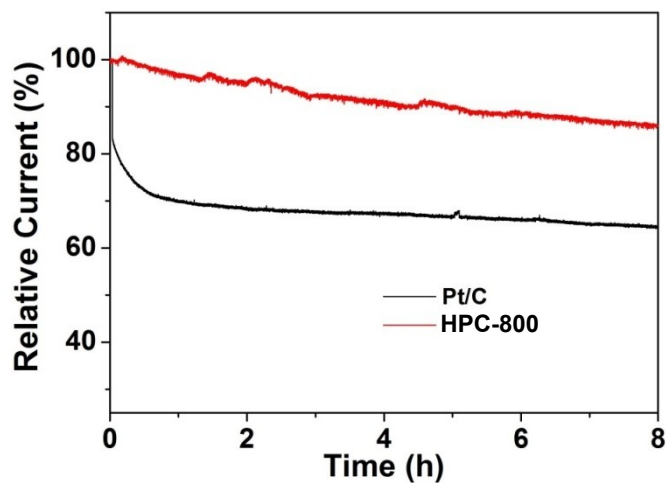

**Fig.S22** Chronoamperometric curves of a glassy-carbon electrode modified with indicated catalysts at +0.60 V vs RHE in an O<sub>2</sub>-saturated 0.1 M KOH solution. Electrode rotation speed was 1225 rpm.

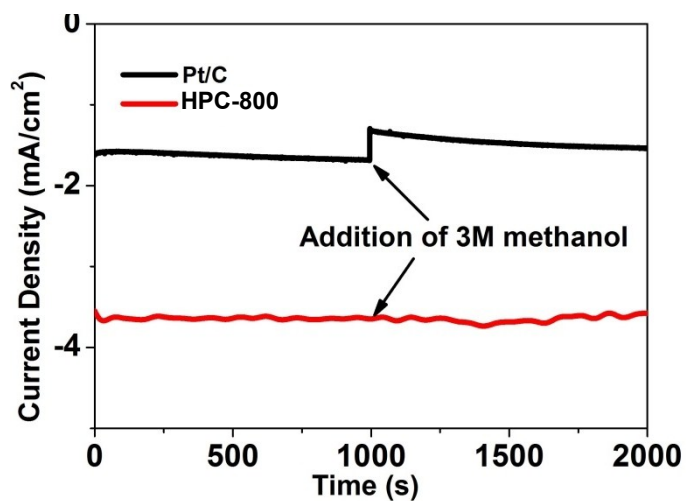

**Fig.S23** Chronoamperometric curves of a glassy-carbon electrode modified with catalysts at +0.60 V vs RHE in an O<sub>2</sub>-saturated 0.1 M KOH solution with 3 M methanol addition at 1000s. Electrode rotation speed 1225 rpm.

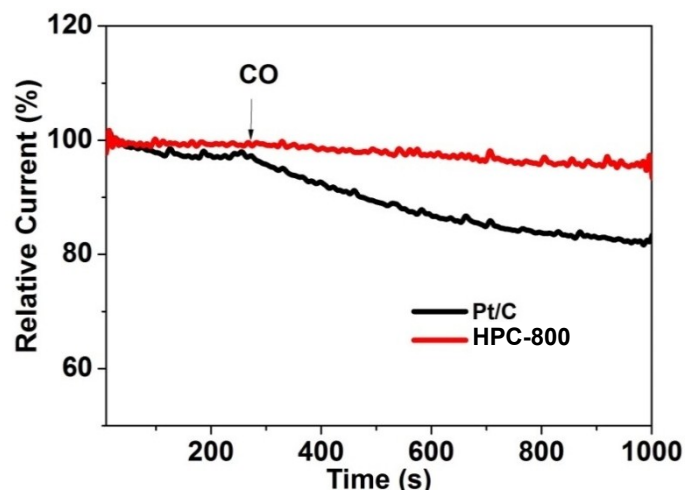

**Fig.S24** Chronoamperometric curves of a glassy-carbon electrode modified with catalysts at +0.60 V vs RHE in an O<sub>2</sub>-saturated 0.1 M KOH solution. CO was injected into the solution at 240s. Electrode rotation speed 1225 rpm.
